# Supplementary material for: Predictors of Early Response, Flares, and Long-Term Adverse Renal Outcomes in Proliferative Lupus Nephritis: A 100-Month Median Follow-Up of an Inception Cohort
Source: MDPI journal article supplement (doi:10.3390/jcm11175017), 2022-08-26

**Supplemental Table S1.** Differences in baseline characteristics between the two major induction treatment groups (mycophenolic acid versus cyclophosphamide).

| Baseline characteristics                         | Mycophenolic acid group (N=27) | Cyclophosphamide group (N=69) | p-value          |
|--------------------------------------------------|--------------------------------|-------------------------------|------------------|
| Age (yr) median(IQR)                             | 31(22)                         | 26(17)                        | 0.25             |
| Sex (M-F)N/%                                     | 5/18-22/82                     | 14/20-55/80                   | 1                |
| Time from SLE diagnosis to LN (years)median(IQR) | 7.5(8)                         | 3(4.5)                        | <b>0.02</b>      |
| SLEDAI score median(IQR)                         | 10(5)                          | 12(2)                         | <b>0.01</b>      |
| Low C3 N/%                                       | 14/56                          | 51/91                         | <b>0.001</b>     |
| Low C4 N/%                                       | 11/44                          | 44/78                         | <b>0.002</b>     |
| Positive anti-dsDNA N/%                          | 18/78                          | 43/79                         | 0.9              |
| Proteinuria (g/24h) mean $\pm$ SD                | 1.3 $\pm$ 2.7                  | 3 $\pm$ 3.6                   | <b>0.009</b>     |
| • Proteinuria >3g/d N/%                          | 9 / 34                         | 37 / 53                       | <b>0.004</b>     |
| • Proteinuria 1-3g/d N/%                         | 6 / 22                         | 23 / 33                       |                  |
| • Proteinuria <1g/d N/%                          | 12 / 44                        | 9 / 14                        |                  |
| Active urine sediment N/%                        | 22/81                          | 67/97                         | <b>0.01</b>      |
| Hypertension N/%                                 | 6/22                           | 21/30                         | 0.4              |
| Serum albumin (g/dl) median(IQR)                 | 3.7(1)                         | 2.8(0.7)                      | <b>0.001</b>     |
| Serum Cr(mg/dl) median(IQR)                      | 0.8(0.4)                       | 0.8(0.8)                      | 0.56             |
| eGFR (ml/min/1.73m <sup>2</sup> ) mean $\pm$ SD  | 100 $\pm$ 39                   | 95 $\pm$ 66                   | 0.67             |
| • eGFR >60 N/%                                   | 23/85                          | 49/70                         | 0.09             |
| • eGFR 30-60 N/%                                 | 4/15                           | 10/15                         |                  |
| • eGFR <30 N/%                                   | -                              | 10/15                         |                  |
| LN class                                         |                                |                               |                  |
| • III N/%                                        | 13/48                          | 13/19                         | <b>&lt;0.01</b>  |
| • IV N/%                                         | 6/22                           | 40/58                         |                  |
| • III + V N/%                                    | 6/22                           | 2/3                           |                  |
| • IV + V N/%                                     | 2/7                            | 14/20                         |                  |
| Number of crescents median(IQR)                  | 1(2)                           | 3(5)                          | <b>0.007</b>     |
| Activity indexmedian(IQR)                        | 7(5.5)                         | 11(6)                         | <b>&lt;0.001</b> |
| Chronicity index median(IQR)                     | 2(3)                           | 2(2)                          | 0.67             |
| Interstitial fibrosis/tubular atrophy*           |                                |                               | 0.73             |
| • <25% N/%                                       | 23 / 85                        | 59 / 88                       |                  |
| • >25% N/%                                       | 4 / 15                         | 8 / 12                        |                  |
| Duration of treatment (months) median(IQR)       | 38.5(38)                       | 43(45)                        | 0.3              |

eGFR: estimated glomerular filtration rate using the CKD-EPI formula, SLEDAI: systemic lupus erythematosus disease activity index, anti-ds DNA: antibodies against double stranded DNA

\*refers to percentage of renal cortex involved by interstitial fibrosis and tubular atrophy

**Supplemental Table S2.** Predictors of complete response at 3-6-9-12-18-24 months.

| Variables                                                           | Complete Remission |                   |                  |
|---------------------------------------------------------------------|--------------------|-------------------|------------------|
|                                                                     | OR                 | 95% Cis           | p-value          |
| <b>3 months</b>                                                     |                    |                   |                  |
| Univariate models                                                   |                    |                   |                  |
| <b>Proteinuria at diagnosis (g/day)</b><br><b>&lt;1.5</b>           | <b>9.4</b>         | <b>3.16, 27</b>   | <b>&lt;0.001</b> |
| <b>6 months</b>                                                     |                    |                   |                  |
| Multivariate model                                                  |                    |                   |                  |
| <b>eGFR at diagnosis(ml/min/1.73m<sup>2</sup>)</b><br><b>&gt;60</b> | 2.85               | 0.85, 9.5         | 0.08             |
| <b>Proteinuria at diagnosis (g/day)</b><br><b>&lt;1.5</b>           | <b>5.3</b>         | <b>1.7, 16.5</b>  | <b>0.004</b>     |
| <b>9 months</b>                                                     |                    |                   |                  |
| Multivariate model                                                  |                    |                   |                  |
| <b>eGFR at diagnosis(ml/min/1.73m<sup>2</sup>)</b><br><b>&gt;60</b> | <b>4.04</b>        | <b>1.22, 13</b>   | <b>0.02</b>      |
| <b>Proteinuria at diagnosis (g/day)</b><br><b>&lt;1.5</b>           | <b>3.7</b>         | <b>1.18, 11.7</b> | <b>0.02</b>      |
| <b>12 months</b>                                                    |                    |                   |                  |
| Multivariate model                                                  |                    |                   |                  |
| <b>eGFR at diagnosis (ml/min/1.73m<sup>2</sup>)</b>                 | 1.68               | 0.53, 5.27        | 0.37             |

|                                                           |             |                  |              |
|-----------------------------------------------------------|-------------|------------------|--------------|
| <b>&gt;60</b>                                             |             |                  |              |
| <b>Proteinuria at diagnosis (g/day)</b><br><b>&lt;1.5</b> | <b>16.9</b> | <b>2.12, 134</b> | <b>0.008</b> |
| <b>Number of Crescents</b>                                | 0.92        | 0.81, 1.03       | 0.18         |
| <b>18 months</b>                                          |             |                  |              |
| Univariate models                                         |             |                  |              |
| <b>Proteinuria at diagnosis (g/day)</b><br><b>&lt;1.5</b> | <b>5.24</b> | <b>1.42, 19</b>  | <b>0.01</b>  |
| <b>24 months</b>                                          |             |                  |              |
| Univariate models                                         |             |                  |              |
| <b>Proteinuria at diagnosis (g/day)</b><br><b>&lt;1.5</b> | <b>4</b>    | <b>1.08, 15</b>  | <b>0.03</b>  |

**Supplemental Table S3.** Response (CR or PR) at different time points as predictors of flare.

| Categories                  | Univariate Models |                        |
|-----------------------------|-------------------|------------------------|
|                             | OR                | 95 CIs<br>(p-value)    |
| <b>Response at 3months</b>  |                   |                        |
| PR or CR                    | Reference group   |                        |
| None                        | 1.05              | 0.41, 2.7 (0.9)        |
| <b>Response at 6months</b>  |                   |                        |
| PR or CR                    | Reference group   |                        |
| None                        | 1.25              | 0.45, 3.4 (0.66)       |
| <b>Response at 9months</b>  |                   |                        |
| PR or CR                    | Reference group   |                        |
| None                        | 2.2               | 0.65, 7.8 (0.19)       |
| <b>Response at 12months</b> |                   |                        |
| PR or CR                    | Reference group   |                        |
| None                        | <b>3.8</b>        | <b>1.03, 14 (0.04)</b> |
| <b>Response at 18months</b> |                   |                        |
| PR or CR                    | Reference group   |                        |
| None                        | <b>4.9</b>        | <b>1.4, 17 (0.01)</b>  |
| <b>Response at 24months</b> |                   |                        |
| PR or CR                    | Reference group   |                        |
| None                        | <b>6.6</b>        | <b>1.2, 34 (0.02)</b>  |

CR:complete response, PR: partial response

**Supplemental Table S4.** Statistical tests examining correlation between independent predictors of risk of flare.

|                                                                    | LN class<br>(III, IV,<br>III/IV+V<br>)              | Induction<br>Treatment<br>(CYC,<br>MPA)               | Age<br>(years)             | Proteinuria<br>at 12m<br>(>0.8<br>vs<0.8<br>g/day) | Time to<br>Either<br>Remission<br>(months) |
|--------------------------------------------------------------------|-----------------------------------------------------|-------------------------------------------------------|----------------------------|----------------------------------------------------|--------------------------------------------|
| <b>Proteinuria at<br/>diagnosis<br/>(&gt;2 vs &lt;2<br/>g/day)</b> | Chi <sup>2</sup><br>(p<0.001)<br>Cramer's<br>V=0.44 | Chi <sup>2</sup><br>(p=0.006)<br>Cramer's<br>V=- 0.28 | Mann-Whitney U<br>(p=0.12) | Chi <sup>2</sup><br>(p=0.01)<br>Cramer's<br>V=0.28 | Mann-Whitney U<br>(p=0.01)                 |
| <b>LN class<br/>(III, IV,<br/>III/IV+V)</b>                        | -                                                   | Chi <sup>2</sup><br>(p=0.003)<br>Cramer's             | Anova<br>(p=0.42)          | Chi <sup>2</sup><br>(p=0.35)<br>Cramer's           | Anova<br>(p=0.65)                          |

|                                                    |   |        |                          |                                                |                                               |
|----------------------------------------------------|---|--------|--------------------------|------------------------------------------------|-----------------------------------------------|
|                                                    |   | V=0.34 |                          | V=0.16                                         |                                               |
| <b>Induction Treatment (CYC, MPA)</b>              | - | -      | Mann–Whitney $U$ (p=0.5) | Chi <sup>2</sup> (p=0.37)<br>Cramer's V= - 0.1 | Mann–Whitney $U$ (p=0.19)                     |
| <b>Age (years)</b>                                 | - | -      | -                        | Mann–Whitney $U$ (p=0.1)                       | Spearman Correlation Coefficient $r_s$ = 0.14 |
| <b>Proteinuria at 12m (&gt;0.8, &lt;0.8 g/day)</b> | - | -      | -                        | -                                              | Mann–Whitney $U$ (p<0.001)                    |

**Supplemental Table S5.** Renal function at presentation, response to treatment and time to renal failure in patients with ESRD.

| <b>Patients with ESRD</b> | <b>GFR at LN diagnosis (ml/min/1.73m<sup>2</sup>)</b> | <b>Renal Response</b> | <b>Time to ESRD (months)</b> |
|---------------------------|-------------------------------------------------------|-----------------------|------------------------------|
| 1                         | 11                                                    | NR                    | 0                            |
| 2                         | 110                                                   | PR                    | 70                           |
| 3                         | 49                                                    | CR                    | 147                          |
| 4                         | 34                                                    | CR                    | 180                          |
| 5                         | 53                                                    | NR                    | 55                           |
| 6                         | 22                                                    | NR                    | 9                            |
| 7                         | 91                                                    | NR                    | 4                            |
| 8                         | 19                                                    | PR                    | 76                           |
| 9                         | 51                                                    | CR                    | 159                          |
| 10                        | 12                                                    | CR                    | 183                          |
| 11                        | 19                                                    | NR                    | 4                            |
| 12                        | 15                                                    | NR                    | 5                            |

eGFR: estimated glomerular filtration rate using the CKD-EPI formula, CR:complete response, PR: partial response, NR: no response, ESRD: end stage renal

**Supplemental Table S6.**Responses at different time points as predictors of adverse renal outcome.

| <b>Categories</b>           | <b>Univariate Models</b> |                             |
|-----------------------------|--------------------------|-----------------------------|
|                             | <b>OR</b>                | <b>95 CIs<br/>(p-value)</b> |
| <b>Response at 3months</b>  |                          |                             |
| PR or CR                    |                          | Reference group             |
| None                        | 2.2                      | 0.82, 6.3 (0.11)            |
| <b>Response at 6months</b>  |                          |                             |
| PR or CR                    |                          | Reference group             |
| None                        | <b>6.4</b>               | <b>2.16, 19 (0.001)</b>     |
| <b>Response at 9months</b>  |                          |                             |
| PR or CR                    |                          | Reference group             |
| None                        | <b>5.5</b>               | <b>1.5, 20 (0.01)</b>       |
| <b>Response at 12months</b> |                          |                             |
| PR or CR                    |                          | Reference group             |
| None                        | <b>17.4</b>              | <b>4, 75 (&lt;0.001)</b>    |
| <b>Response at 18months</b> |                          |                             |
| PR or CR                    |                          | Reference group             |
| None                        | <b>10.7</b>              | <b>2.9, 39 (&lt;0.001)</b>  |
| <b>Response at 24months</b> |                          |                             |
| PR or CR                    |                          | Reference group             |
| None                        | <b>10.5</b>              | <b>2.3, 47(0.002)</b>       |

**Supplemental Table S7.** Statistical tests examining correlation between independent predictors of risk of adverse renal outcome.

|                                                                   | <b>eGFR at diagnosis</b><br>(>60, <60 ml/min/1.73m <sup>2</sup> ) | <b>Interstitial fibrosis/Tubular atrophy</b><br>(<25%, >25%) | <b>Proteinuria at 12m</b><br>(>0.8, <0.8 g/day)  | <b>Time to Either Remission</b><br>(months) |
|-------------------------------------------------------------------|-------------------------------------------------------------------|--------------------------------------------------------------|--------------------------------------------------|---------------------------------------------|
| <b>Proteinuria at diagnosis</b><br>(>1.5<1.5g/day)                | Chi <sup>2</sup><br>(p=0.01)<br>Cramer's<br>V=0.23                | Chi <sup>2</sup> (p=0.51)<br>Cramer's<br>V=-0.06             | Chi <sup>2</sup> (p=0.008)<br>Cramer's<br>V=0.29 | Mann-Whitney <i>U</i><br>(p=0.02)           |
| <b>eGFR at diagnosis</b><br>(>60, <60 ml/min/1.73m <sup>2</sup> ) | -                                                                 | Chi <sup>2</sup><br>(p<0.001)<br>Cramer's<br>V=0.39          | Chi <sup>2</sup> (p=0.08)<br>Cramer's<br>V=0.19  | Mann-Whitney <i>U</i><br>(p=0.03)           |
| <b>Interstitial fibrosis/Tubular atrophy</b><br>(<25%, >25%)      | -                                                                 | -                                                            | Chi <sup>2</sup> (p=0.54)<br>Cramer's<br>V=0.06  | Mann-Whitney <i>U</i><br>(p=0.24)           |
| <b>Proteinuria at 12m</b> (>0.8, <0.8 g/day)                      | -                                                                 | -                                                            | -                                                | Mann-Whitney <i>U</i><br>(p<0.001)          |

**Supplementary Figure S1:** Kaplan-Meier survival estimates of probability for response according to [a] proliferative lupus nephritis class [b] treatment with cyclophosphamide versus MPA/MMF

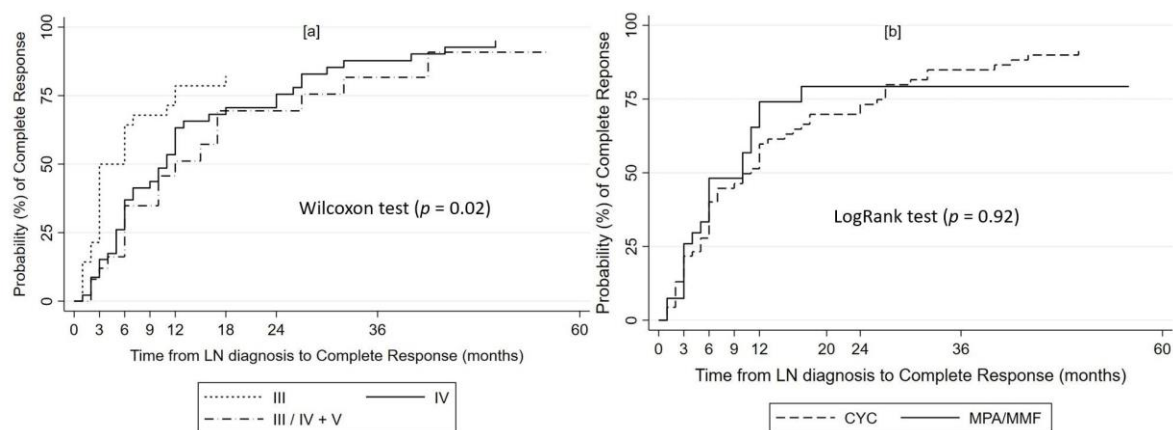

Supplement: s1 [file s1]
